# Supplementary material for: Relationship Between Mortality and Seizures After Intracerebral Hemorrhage: A Systematic Review and Meta-Analysis
Source: PubMed Central journal article supplement (PMC9251061; doi:10.3389/fneur.2022.922677), 2022-06-20
Supplement: Table_1.pdf [file Table_1.pdf]

Source: Embase; Search on: November 30, 2021; Result: 5377

| Search | Query                                                                                                                                                                          |
|--------|--------------------------------------------------------------------------------------------------------------------------------------------------------------------------------|
| 1      | brain hemorrhage'/exp                                                                                                                                                          |
| 2      | brain hemorrhage':ab,ti                                                                                                                                                        |
| 3      | brain hemorrhages':ab,ti                                                                                                                                                       |
| 4      | cerebral hemorrhage':ab,ti                                                                                                                                                     |
| 5      | cerebral hemorrhages':ab,ti                                                                                                                                                    |
| 6      | intracranial hemorrhage':ab,ti                                                                                                                                                 |
| 7      | intracranial hemorrhages':ab,ti                                                                                                                                                |
| 8      | intracerebral hemorrhage':ab,ti                                                                                                                                                |
| 9      | intracerebral hemorrhages':ab,ti                                                                                                                                               |
| 10     | cerebral:ab,ti OR intracerebral:ab,ti OR intracranial:ab,ti OR brain:ab,ti OR hypertensive:ab,ti                                                                               |
| 11     | hemorrhag*:ab,ti OR haemorrhag*:ab,ti OR hematoma:ab,ti OR bleed*:ab,ti                                                                                                        |
| 12     | #10 AND #11                                                                                                                                                                    |
| 13     | hemorrhag*:ab,ti OR haemorrhag*:ab,ti                                                                                                                                          |
| 14     | cerebrovascular disease':ab,ti OR 'cerebrovascular diseases':ab,ti OR 'cerebral vascular disease':ab,ti OR 'cerebral vascular diseases':ab,ti OR stroke:ab,ti OR strokes:ab,ti |
| 15     | #13 AND #14                                                                                                                                                                    |
| 16     | hematencephalon:ab,ti                                                                                                                                                          |
| 17     | encephalorrhagia:ab,ti                                                                                                                                                         |
| 18     | #1 OR #2 OR #3 OR #4 OR #5 OR #6 OR #7 OR #8 OR #9 OR #12 OR #15 OR #16 OR #17                                                                                                 |
| 19     | seizure'/exp                                                                                                                                                                   |
| 20     | seizure:ab,ti                                                                                                                                                                  |
| 21     | seizures:ab,ti                                                                                                                                                                 |
| 22     | convulsi*:ab,ti                                                                                                                                                                |
| 23     | epilepsy'/exp                                                                                                                                                                  |
| 24     | epilep*:ab,ti                                                                                                                                                                  |
| 25     | #19 OR #20 OR #21 OR #22 OR #23 OR #24                                                                                                                                         |
| 26     | mortality'/exp                                                                                                                                                                 |
| 27     | mortality:ab,ti                                                                                                                                                                |
| 28     | mortalities:ab,ti                                                                                                                                                              |
| 29     | survival:ab,ti                                                                                                                                                                 |
| 30     | survivals:ab,ti                                                                                                                                                                |
| 31     | death:ab,ti                                                                                                                                                                    |
| 32     | deaths:ab,ti                                                                                                                                                                   |
| 33     | #26 OR #27 OR #28 OR #29 OR #30 OR #31 OR #32                                                                                                                                  |



---

| Results   |
|-----------|
| 161,934   |
| 1,365     |
| 213       |
| 6,956     |
| 662       |
| 17,201    |
| 1,570     |
| 19,936    |
| 1,299     |
| 1,983,348 |
| 732,709   |
| 139,301   |
| 381,647   |
| 463,310   |
| 52,227    |
| 12        |
| 25        |
| 226,536   |
| 165,462   |
| 107,336   |
| 149,186   |
| 36,749    |
| 269,035   |
| 216,537   |
| 431,849   |
| 1,230,647 |
| 1,259,885 |
| 15,594    |
| 1,548,933 |
| 16,043    |
| 1,107,738 |
| 285,572   |
| 3,697,294 |

5,377
