# Supplementary material for: Relationship Between Mortality and Seizures After Intracerebral Hemorrhage: A Systematic Review and Meta-Analysis
Source: PubMed Central journal article supplement (PMC9251061; doi:10.3389/fneur.2022.922677), 2022-06-20
Supplement: Table_2.pdf [file Table_2.pdf]

Source: PubMed; Search on: November 30, 2021; Result: 3,921

| Search | Query                                                                                                                                                   |
|--------|---------------------------------------------------------------------------------------------------------------------------------------------------------|
| 1      | cerebral hemorrhage[MeSH]                                                                                                                               |
| 2      | cerebral hemorrhage[tiab]                                                                                                                               |
| 3      | cerebral hemorrhages[tiab]                                                                                                                              |
| 4      | intracranial hemorrhages[MeSH]                                                                                                                          |
| 5      | intracranial hemorrhage[tiab]                                                                                                                           |
| 6      | intracranial hemorrhages[tiab]                                                                                                                          |
| 7      | intracerebral hemorrhage[tiab]                                                                                                                          |
| 8      | intracerebral hemorrhages[tiab]                                                                                                                         |
| 9      | brain hemorrhage[tiab]                                                                                                                                  |
| 10     | brain hemorrhages[tiab]                                                                                                                                 |
| 11     | (cerebral or intracerebral or intracranial or brain or hypertensive) AND (hemorrhag* or haemorrhag* or hematoma or bleed*)                              |
| 12     | hemorrhag* or haemorrhag*                                                                                                                               |
| 13     | (((((cerebrovascular disease) OR (cerebrovascular diseases)) OR (cerebral vascular disease)) OR (cerebral vascular diseases)) OR (stroke)) OR (strokes) |
| 14     | #12 AND #13                                                                                                                                             |
| 15     | hematencephalon[tiab]                                                                                                                                   |
| 16     | encephalorrhagia[tiab]                                                                                                                                  |
| 17     | #1 OR #2 OR #3 OR #4 OR #5 OR #6 OR #7 OR #8 OR #9 OR #10 OR #11 OR #14 OR #15 OR #16                                                                   |
| 18     | seizures[MeSH]                                                                                                                                          |
| 19     | seizure [tiab]                                                                                                                                          |
| 20     | seizures [tiab]                                                                                                                                         |
| 21     | convulsi*[tiab]                                                                                                                                         |
| 22     | epilepsy[MeSH]                                                                                                                                          |
| 23     | epilep* [tiab]                                                                                                                                          |
| 24     | #18 OR #19 OR #20 OR #21 OR #22 OR #23                                                                                                                  |
| 25     | mortality[MeSH]                                                                                                                                         |
| 26     | mortality[tiab]                                                                                                                                         |
| 27     | mortalities[tiab]                                                                                                                                       |
| 28     | survival[tiab]                                                                                                                                          |
| 29     | survivals[tiab]                                                                                                                                         |
| 30     | death[tiab]                                                                                                                                             |
| 31     | deaths[tiab]                                                                                                                                            |
| 32     | #25 OR #26 OR #27 OR #28 OR #29 OR #30 OR #31                                                                                                           |
| 33     | #17 AND #24 AND #32                                                                                                                                     |

---

Results

---

35,674

7,595

477

75,525

11,110

1,218

13,677

925

1,028

155

766,399

404,762

669,323

105,220

8

12

786,132

67,967

71,092

99,656

27,703

118,370

151,707

255,995

410,719

865,699

11,242

1,050,655

10,048

789,223

198,382

2,511,337

3,921
